# Supplementary material
Source: publisher site journal article supplement (https://www.dovepress.com/article/221608)
Supplement: Supplementary file 1 [file get_supplementary_file.php]

| **Analysis time (hours)** | **Hydrodynamic diameter of NPs by DLS (nm)** | | **Polydispersity index** | |
| --- | --- | --- | --- | --- |
| **Average size** | **Standard deviation** | **Average value** | **Standard deviation** |
| 0 | 114 | 2 | 0.127 | 0.013 |
| 1 | 127 | 2 | 0.202 | 0.015 |
| 2 | 136 | 2 | 0.239 | 0.014 |
| 3 | 151 | 3 | 0.314 | 0.022 |
| 4 | 180 | 5 | 0.440 | 0.055 |
| 5 | 221 | 23 | 0.487 | 0.094 |
| 6 | 334 | 35 | 0.548 | 0.091 |
| 7 | 426 | 37 | 0.602 | 0.059 |
| 8 | 685 | 169 | 0.702 | 0.113 |
| 9 | 857 | 251 | 0.716 | 0.090 |
| 10 | 1383 | 313 | 0.758 | 0.048 |
| 11 | 1573 | 750 | 0.724 | 0.150 |
| 12 | 662 | 75 | 0.556 | 0.053 |
| 13 | 703 | 171 | 0.596 | 0.113 |
| 14 | 1047 | 318 | 0.738 | 0.149 |
| 15 | 584 | 110 | 0.590 | 0.069 |
| 16 | 606 | 140 | 0.559 | 0.122 |
| 17 | 780 | 193 | 0.675 | 0.144 |
| 18 | 596 | 140 | 0.609 | 0.170 |
| 19 | 583 | 80 | 0.508 | 0.039 |
| 20 | 872 | 557 | 0.666 | 0.206 |
| 21 | 1043 | 280 | 0.764 | 0.098 |
| 22 | 903 | 406 | 0.670 | 0.166 |
| 23 | 826 | 243 | 0.646 | 0.156 |
| 24 | 900 | 387 | 0.629 | 0.178 |

Supplementary materials

Table S1. The results of the characterization of a suspension of ZnO NPs in deionised water.

| **Analysis time (hours)** | **Hydrodynamic diameter of NPs by DLS (nm)** | | **Polydispersity index** | |
| --- | --- | --- | --- | --- |
| **Average size** | **Standard deviation** | **Average value** | **Standard deviation** |
| 0 | 118 | 1 | 0.177 | 0.011 |
| 1 | 121 | 2 | 0.220 | 0.012 |
| 2 | 127 | 4 | 0.257 | 0.030 |
| 3 | 138 | 7 | 0.296 | 0.028 |
| 4 | 151 | 8 | 0.341 | 0.040 |
| 5 | 169 | 11 | 0.436 | 0.059 |
| 6 | 209 | 26 | 0.518 | 0.090 |
| 7 | 201 | 11 | 0.500 | 0.048 |
| 8 | 231 | 19 | 0.492 | 0.071 |
| 9 | 633 | 203 | 0.780 | 0.132 |
| 10 | 589 | 166 | 0.776 | 0.070 |
| 11 | 834 | 262 | 0.732 | 0.128 |
| 12 | 1202 | 421 | 0.886 | 0.128 |
| 13 | 841 | 258 | 0.664 | 0.099 |
| 14 | 1020 | 240 | 0.752 | 0.158 |
| 15 | 867 | 330 | 0.701 | 0.222 |
| 16 | 633 | 103 | 0.563 | 0.105 |
| 17 | 726 | 76 | 0.617 | 0.157 |
| 18 | 678 | 138 | 0.590 | 0.118 |
| 19 | 596 | 159 | 0.508 | 0.161 |
| 20 | 784 | 371 | 0.642 | 0.209 |
| 21 | 530 | 68 | 0.590 | 0.103 |
| 22 | 584 | 122 | 0.589 | 0.156 |
| 23 | 605 | 245 | 0.519 | 0.127 |
| 24 | 526 | 80 | 0.458 | 0.084 |

Table S2. The results of the characterization of a suspension of ZnO+0.1%Ag NPs in deionised water.

| **Analysis time (hours)** | **Hydrodynamic diameter of NPs by DLS (nm)** | | **Polydispersity index** | |
| --- | --- | --- | --- | --- |
| **Average size** | **Standard deviation** | **Average value** | **Standard deviation** |
| 0 | 145 | 1 | 0.197 | 0.015 |
| 1 | 146 | 2 | 0.205 | 0.023 |
| 2 | 155 | 8 | 0.258 | 0.050 |
| 3 | 153 | 3 | 0.257 | 0.019 |
| 4 | 164 | 9 | 0.292 | 0.035 |
| 5 | 189 | 18 | 0.382 | 0.077 |
| 6 | 192 | 12 | 0.438 | 0.080 |
| 7 | 225 | 35 | 0.513 | 0.127 |
| 8 | 242 | 36 | 0.501 | 0.095 |
| 9 | 260 | 37 | 0.534 | 0.081 |
| 10 | 256 | 35 | 0.491 | 0.083 |
| 11 | 289 | 35 | 0.525 | 0.100 |
| 12 | 375 | 71 | 0.557 | 0.066 |
| 13 | 363 | 54 | 0.509 | 0.052 |
| 14 | 1281 | 527 | 0.774 | 0.170 |
| 15 | 1375 | 580 | 0.855 | 0.125 |
| 16 | 689 | 153 | 0.683 | 0.092 |
| 17 | 557 | 142 | 0.584 | 0.112 |
| 18 | 643 | 211 | 0.583 | 0.128 |
| 19 | 679 | 155 | 0.590 | 0.070 |
| 20 | 1309 | 611 | 0.791 | 0.182 |
| 21 | 693 | 228 | 0.586 | 0.159 |
| 22 | 754 | 425 | 0.574 | 0.174 |
| 23 | 672 | 149 | 0.570 | 0.100 |
| 24 | 1198 | 517 | 0.858 | 0.152 |

Table S3. The results of the characterization of a suspension of ZnO+1%Ag NPs in deionised water.

| **Analysis time (hours)** | **Hydrodynamic diameter of NPs by DLS (nm)** | | **Polydispersity index** | |
| --- | --- | --- | --- | --- |
| **Average size** | **Standard deviation** | **Average value** | **Standard deviation** |
| 0 | 642 | 44 | 0.584 | 0.048 |
| 1 | 3110 | 1245 | 0.602 | 0.215 |
| 2 | 1464 | 679 | 0.944 | 0.077 |
| 3 | 758 | 188 | 0.687 | 0.217 |
| 4 | 451 | 112 | 0.677 | 0.246 |
| 5 | 1188 | 542 | 0.916 | 0.091 |
| 6 | 423 | 249 | 0.793 | 0.127 |
| 7 | 503 | 148 | 0.817 | 0.107 |
| 8 | 670 | 226 | 0.764 | 0.199 |
| 9 | 688 | 317 | 0.636 | 0.172 |
| 10 | 539 | 90 | 0.554 | 0.063 |
| 11 | 484 | 102 | 0.728 | 0.151 |
| 12 | 514 | 169 | 0.592 | 0.124 |
| 13 | 375 | 61 | 0.481 | 0.187 |
| 14 | 348 | 45 | 0.474 | 0.067 |
| 15 | 364 | 36 | 0.462 | 0.087 |
| 16 | 362 | 43 | 0.431 | 0.075 |
| 17 | 404 | 61 | 0.511 | 0.060 |
| 18 | 314 | 26 | 0.434 | 0.087 |
| 19 | 343 | 21 | 0.456 | 0.042 |
| 20 | 372 | 32 | 0.453 | 0.071 |
| 21 | 308 | 17 | 0.459 | 0.049 |
| 22 | 301 | 26 | 0.466 | 0.063 |
| 23 | 293 | 15 | 0.458 | 0.081 |
| 24 | 342 | 31 | 0.481 | 0.044 |

Table S4. The results of the characterization of a suspension of ZnO+10%Ag NPs in deionised water.

| **Analysis time (hours)** | **Hydrodynamic diameter of NPs by DLS (nm)** | | **Polydispersity index** | |
| --- | --- | --- | --- | --- |
| **Average size** | **Standard deviation** | **Average value** | **Standard deviation** |
| 0 | 239 | 8 | 0.609 | 0.119 |
| 1 | 272 | 13 | 0.611 | 0.148 |
| 2 | 304 | 38 | 0.620 | 0.159 |
| 3 | 330 | 34 | 0.660 | 0.148 |
| 4 | 358 | 19 | 0.702 | 0.152 |
| 5 | 347 | 36 | 0.737 | 0.088 |
| 6 | 352 | 11 | 0.706 | 0.110 |
| 7 | 372 | 27 | 0.601 | 0.126 |
| 8 | 373 | 28 | 0.657 | 0.107 |
| 9 | 379 | 30 | 0.619 | 0.126 |
| 10 | 398 | 28 | 0.685 | 0.165 |
| 11 | 408 | 21 | 0.694 | 0.082 |
| 12 | 423 | 21 | 0.662 | 0.127 |
| 13 | 394 | 19 | 0.704 | 0.115 |
| 14 | 422 | 65 | 0.640 | 0.126 |
| 15 | 431 | 24 | 0.567 | 0.119 |
| 16 | 430 | 23 | 0.706 | 0.147 |
| 17 | 451 | 31 | 0.633 | 0.136 |
| 18 | 434 | 15 | 0.740 | 0.116 |
| 19 | 450 | 21 | 0.703 | 0.109 |
| 20 | 455 | 23 | 0.627 | 0.127 |
| 21 | 463 | 26 | 0.754 | 0.079 |
| 22 | 448 | 16 | 0.727 | 0.078 |
| 23 | 480 | 56 | 0.694 | 0.095 |
| 24 | 466 | 15 | 0.606 | 0.125 |

Table S5. The results of the characterization of a suspension of Ag NPs in deionised water.

| **Analysis time (hours)** | **Hydrodynamic diameter of NPs by DLS (nm)** | | **Polydispersity index** | |
| --- | --- | --- | --- | --- |
| **Average size** | **Standard deviation** | **Average value** | **Standard deviation** |
| 0 | 1644 | 57 | 0.542 | 0.063 |
| 1 | 1889 | 72 | 0.572 | 0.064 |
| 2 | 2231 | 134 | 0.548 | 0.059 |
| 3 | 2520 | 169 | 0.537 | 0.090 |
| 4 | 2584 | 68 | 0.539 | 0.048 |
| 5 | 2771 | 157 | 0.519 | 0.089 |
| 6 | 2965 | 113 | 0.551 | 0.111 |
| 7 | 3047 | 166 | 0.543 | 0.094 |
| 8 | 3118 | 93 | 0.537 | 0.077 |
| 9 | 3457 | 230 | 0.579 | 0.066 |
| 10 | 3478 | 222 | 0.506 | 0.079 |
| 11 | 3699 | 613 | 0.541 | 0.087 |
| 12 | 3490 | 167 | 0.525 | 0.054 |
| 13 | 3718 | 342 | 0.513 | 0.086 |
| 14 | 3682 | 909 | 0.481 | 0.090 |
| 15 | 3872 | 327 | 0.542 | 0.039 |
| 16 | 3758 | 304 | 0.551 | 0.073 |
| 17 | 3815 | 202 | 0.547 | 0.085 |
| 18 | 3797 | 247 | 0.548 | 0.065 |
| 19 | 3887 | 138 | 0.511 | 0.067 |
| 20 | 3947 | 139 | 0.553 | 0.077 |
| 21 | 4087 | 230 | 0.529 | 0.064 |
| 22 | 4043 | 147 | 0.511 | 0.077 |
| 23 | 4047 | 243 | 0.562 | 0.115 |
| 24 | 900 | 387 | 0.629 | 0.178 |

Table S6. The results of the characterization of a suspension of ZnO NPs in artificial saliva.

| **Analysis time (hours)** | **Hydrodynamic diameter of NPs by DLS (nm)** | | **Polydispersity index** | |
| --- | --- | --- | --- | --- |
| **Average size** | **Standard deviation** | **Average value** | **Standard deviation** |
| 0 | 1701 | 93 | 0.590 | 0.108 |
| 1 | 1860 | 103 | 0.546 | 0.070 |
| 2 | 2123 | 79 | 0.572 | 0.071 |
| 3 | 2469 | 160 | 0.574 | 0.026 |
| 4 | 2525 | 127 | 0.572 | 0.068 |
| 5 | 2618 | 107 | 0.579 | 0.058 |
| 6 | 2971 | 387 | 0.522 | 0.045 |
| 7 | 2853 | 122 | 0.609 | 0.072 |
| 8 | 2944 | 88 | 0.539 | 0.078 |
| 9 | 3174 | 120 | 0.517 | 0.055 |
| 10 | 3383 | 228 | 0.577 | 0.053 |
| 11 | 3246 | 196 | 0.540 | 0.105 |
| 12 | 3365 | 86 | 0.565 | 0.067 |
| 13 | 3475 | 168 | 0.577 | 0.071 |
| 14 | 3556 | 269 | 0.524 | 0.077 |
| 15 | 3552 | 128 | 0.568 | 0.074 |
| 16 | 3666 | 219 | 0.603 | 0.091 |
| 17 | 3768 | 146 | 0.554 | 0.050 |
| 18 | 3802 | 390 | 0.587 | 0.074 |
| 19 | 3810 | 204 | 0.488 | 0.069 |
| 20 | 3778 | 138 | 0.541 | 0.037 |
| 21 | 3703 | 274 | 0.555 | 0.076 |
| 22 | 3976 | 343 | 0.498 | 0.116 |
| 23 | 3956 | 296 | 0.581 | 0.075 |
| 24 | 3946 | 268 | 0.547 | 0.058 |

Table S7. The results of the characterization of a suspension of ZnO+0.1%Ag NPs in artificial saliva.

| **Analysis time (hours)** | **Hydrodynamic diameter of NPs by DLS (nm)** | | **Polydispersity index** | |
| --- | --- | --- | --- | --- |
| **Average size** | **Standard deviation** | **Average value** | **Standard deviation** |
| 0 | 2315 | 168 | 0.570 | 0.040 |
| 1 | 2599 | 60 | 0.598 | 0.035 |
| 2 | 2724 | 148 | 0.590 | 0.076 |
| 3 | 3084 | 203 | 0.544 | 0.070 |
| 4 | 3224 | 251 | 0.571 | 0.087 |
| 5 | 3311 | 164 | 0.554 | 0.057 |
| 6 | 3473 | 217 | 0.563 | 0.037 |
| 7 | 3567 | 231 | 0.568 | 0.079 |
| 8 | 3649 | 187 | 0.554 | 0.034 |
| 9 | 3861 | 211 | 0.596 | 0.040 |
| 10 | 4035 | 507 | 0.540 | 0.049 |
| 11 | 4094 | 291 | 0.519 | 0.093 |
| 12 | 4042 | 237 | 0.573 | 0.068 |
| 13 | 4377 | 209 | 0.549 | 0.063 |
| 14 | 4081 | 390 | 0.569 | 0.064 |
| 15 | 4619 | 314 | 0.549 | 0.038 |
| 16 | 4377 | 272 | 0.501 | 0.059 |
| 17 | 4323 | 236 | 0.557 | 0.063 |
| 18 | 4473 | 337 | 0.541 | 0.041 |
| 19 | 4356 | 238 | 0.522 | 0.104 |
| 20 | 4631 | 270 | 0.571 | 0.043 |
| 21 | 4959 | 528 | 0.603 | 0.059 |
| 22 | 4608 | 157 | 0.534 | 0.079 |
| 23 | 4820 | 244 | 0.537 | 0.074 |
| 24 | 4907 | 499 | 0.540 | 0.051 |

Table S8. The results of the characterization of a suspension of ZnO+1%Ag NPs in artificial saliva.

| **Analysis time (hours)** | **Hydrodynamic diameter of NPs by DLS (nm)** | | **Polydispersity index** | |
| --- | --- | --- | --- | --- |
| **Average size** | **Standard deviation** | **Average value** | **Standard deviation** |
| 0 | 8388 | 1376 | 0.898 | 0.085 |
| 1 | 22887 | 4073 | 0.650 | 0.182 |
| 2 | 15178 | 7463 | 0.851 | 0.227 |
| 3 | 19651 | 7908 | 0.660 | 0.281 |
| 4 | 14170 | 5829 | 0.832 | 0.215 |
| 5 | 18396 | 6099 | 0.767 | 0.256 |
| 6 | 22747 | 6880 | 0.685 | 0.249 |
| 7 | 20688 | 6756 | 0.631 | 0.222 |
| 8 | 19826 | 8105 | 0.647 | 0.247 |
| 9 | 23395 | 5877 | 0.584 | 0.131 |
| 10 | 26278 | 5250 | 0.418 | 0.081 |
| 11 | 23567 | 1305 | 0.496 | 0.044 |
| 12 | 16238 | 4113 | 0.735 | 0.194 |
| 13 | 17548 | 8869 | 0.712 | 0.290 |
| 14 | 21300 | 4696 | 0.458 | 0.169 |
| 15 | 23745 | 3244 | 0.455 | 0.043 |
| 16 | 16795 | 5533 | 0.772 | 0.221 |
| 17 | 17470 | 6022 | 0.786 | 0.234 |
| 18 | 20482 | 3054 | 0.465 | 0.041 |
| 19 | 21843 | 2669 | 0.510 | 0.049 |
| 20 | 23947 | 3991 | 0.453 | 0.050 |
| 21 | 21490 | 4692 | 0.516 | 0.143 |
| 22 | 22715 | 2713 | 0.537 | 0.017 |
| 23 | 17698 | 6956 | 0.590 | 0.234 |
| 24 | 17792 | 2409 | 0.531 | 0.098 |

Table S9. The results of the characterization of a suspension of ZnO+10%Ag NPs in artificial saliva.

| **Analysis time (hours)** | **Hydrodynamic diameter of NPs by DLS (nm)** | | **Polydispersity index** | |
| --- | --- | --- | --- | --- |
| **Average size** | **Standard deviation** | **Average value** | **Standard deviation** |
| 0 | 2162 | 219 | 0.883 | 0.179 |
| 1 | 2386 | 157 | 0.721 | 0.149 |
| 2 | 2816 | 245 | 0.802 | 0.164 |
| 3 | 3089 | 347 | 0.731 | 0.147 |
| 4 | 2988 | 250 | 0.862 | 0.179 |
| 5 | 3715 | 322 | 0.667 | 0.171 |
| 6 | 4145 | 338 | 0.696 | 0.035 |
| 7 | 4055 | 193 | 0.663 | 0.046 |
| 8 | 4513 | 325 | 0.622 | 0.055 |
| 9 | 4373 | 225 | 0.712 | 0.144 |
| 10 | 4177 | 329 | 0.753 | 0.194 |
| 11 | 4279 | 290 | 0.650 | 0.030 |
| 12 | 4301 | 435 | 0.607 | 0.052 |
| 13 | 4184 | 357 | 0.676 | 0.172 |
| 14 | 4372 | 470 | 0.725 | 0.095 |
| 15 | 4603 | 460 | 0.660 | 0.077 |
| 16 | 5041 | 115 | 0.665 | 0.047 |
| 17 | 4808 | 571 | 0.722 | 0.165 |
| 18 | 4530 | 299 | 0.641 | 0.067 |
| 19 | 4744 | 439 | 0.642 | 0.047 |
| 20 | 5105 | 368 | 0.719 | 0.049 |
| 21 | 5154 | 603 | 0.688 | 0.039 |
| 22 | 4820 | 518 | 0.691 | 0.060 |
| 23 | 4555 | 408 | 0.632 | 0.090 |
| 24 | 4757 | 503 | 0.675 | 0.167 |

Table S10. The results of the characterization of a suspension of Ag NPs in artificial saliva.

| **Analysis time (hours)** | **Hydrodynamic diameter of NPs by DLS (nm)** | | **Polydispersity index** | |
| --- | --- | --- | --- | --- |
| **Average size** | **Standard deviation** | **Average value** | **Standard deviation** |
| 0 | 379 | 18 | 0.413 | 0.086 |
| 1 | 1003 | 124 | 0.799 | 0.092 |
| 2 | 949 | 65 | 0.762 | 0.068 |
| 3 | 879 | 70 | 0.743 | 0.042 |
| 4 | 921 | 121 | 0.762 | 0.116 |
| 5 | 802 | 73 | 0.776 | 0.181 |
| 6 | 820 | 83 | 0.770 | 0.121 |
| 7 | 846 | 69 | 0.674 | 0.051 |
| 8 | 885 | 52 | 0.696 | 0.037 |
| 9 | 788 | 62 | 0.692 | 0.036 |
| 10 | 811 | 58 | 0.733 | 0.100 |
| 11 | 781 | 88 | 0.783 | 0.118 |
| 12 | 814 | 51 | 0.673 | 0.036 |
| 13 | 765 | 72 | 0.753 | 0.125 |
| 14 | 1632 | 281 | 1.000 | 0.121 |
| 15 | 786 | 64 | 0.697 | 0.018 |
| 16 | 766 | 41 | 0.651 | 0.048 |
| 17 | 754 | 53 | 0.688 | 0.052 |
| 18 | 712 | 41 | 0.661 | 0.058 |
| 19 | 747 | 102 | 0.742 | 0.123 |
| 20 | 692 | 129 | 0.824 | 0.119 |
| 21 | 726 | 49 | 0.707 | 0.099 |
| 22 | 715 | 54 | 0.668 | 0.062 |
| 23 | 703 | 57 | 0.641 | 0.078 |
| 24 | 653 | 80 | 0.713 | 0.060 |

Table S11. The results of the characterization of a suspension of ZnO NPs in human saliva.

| **Analysis time (hours)** | **Hydrodynamic diameter of NPs by DLS (nm)** | | **Polydispersity index** | |
| --- | --- | --- | --- | --- |
| **Average size** | **Standard deviation** | **Average value** | **Standard deviation** |
| 0 | 341 | 16 | 0.690 | 0.029 |
| 1 | 917 | 209 | 0.772 | 0.060 |
| 2 | 817 | 116 | 0.799 | 0.102 |
| 3 | 928 | 173 | 0.799 | 0.068 |
| 4 | 845 | 146 | 0.751 | 0.054 |
| 5 | 852 | 154 | 0.775 | 0.067 |
| 6 | 926 | 228 | 0.778 | 0.047 |
| 7 | 861 | 122 | 0.776 | 0.066 |
| 8 | 842 | 106 | 0.759 | 0.065 |
| 9 | 853 | 158 | 0.801 | 0.106 |
| 10 | 925 | 158 | 0.782 | 0.069 |
| 11 | 876 | 71 | 0.766 | 0.037 |
| 12 | 804 | 47 | 0.747 | 0.037 |
| 13 | 857 | 118 | 0.772 | 0.059 |
| 14 | 831 | 86 | 0.745 | 0.051 |
| 15 | 843 | 57 | 0.757 | 0.037 |
| 16 | 895 | 71 | 0.757 | 0.018 |
| 17 | 861 | 124 | 0.747 | 0.044 |
| 18 | 836 | 75 | 0.730 | 0.027 |
| 19 | 866 | 53 | 0.765 | 0.048 |
| 20 | 824 | 105 | 0.710 | 0.048 |
| 21 | 882 | 94 | 0.760 | 0.041 |
| 22 | 859 | 120 | 0.734 | 0.055 |
| 23 | 856 | 25 | 0.757 | 0.026 |
| 24 | 839 | 139 | 0.791 | 0.109 |

Table S12. The results of the characterization of a suspension of ZnO+0.1%Ag NPs in human saliva.

| **Analysis time (hours)** | **Hydrodynamic diameter of NPs by DLS (nm)** | | **Polydispersity index** | |
| --- | --- | --- | --- | --- |
| **Average size** | **Standard deviation** | **Average value** | **Standard deviation** |
| 0 | 367 | 44 | 0.518 | 0.100 |
| 1 | 472 | 76 | 0.616 | 0.094 |
| 2 | 456 | 55 | 0.641 | 0.084 |
| 3 | 474 | 52 | 0.646 | 0.124 |
| 4 | 476 | 47 | 0.634 | 0.095 |
| 5 | 461 | 46 | 0.658 | 0.090 |
| 6 | 477 | 23 | 0.631 | 0.121 |
| 7 | 496 | 27 | 0.571 | 0.093 |
| 8 | 472 | 27 | 0.653 | 0.101 |
| 9 | 490 | 38 | 0.631 | 0.092 |
| 10 | 490 | 76 | 0.668 | 0.054 |
| 11 | 521 | 43 | 0.662 | 0.127 |
| 12 | 486 | 26 | 0.661 | 0.068 |
| 13 | 508 | 42 | 0.594 | 0.114 |
| 14 | 530 | 46 | 0.589 | 0.088 |
| 15 | 506 | 44 | 0.594 | 0.081 |
| 16 | 539 | 64 | 0.567 | 0.065 |
| 17 | 520 | 37 | 0.618 | 0.095 |
| 18 | 537 | 53 | 0.593 | 0.036 |
| 19 | 531 | 57 | 0.595 | 0.109 |
| 20 | 489 | 40 | 0.695 | 0.135 |
| 21 | 523 | 40 | 0.580 | 0.033 |
| 22 | 539 | 43 | 0.627 | 0.112 |
| 23 | 558 | 31 | 0.544 | 0.027 |
| 24 | 537 | 51 | 0.612 | 0.104 |

Table S13. The results of the characterization of a suspension of ZnO+1%Ag NPs in human saliva.

| **Analysis time (hours)** | **Hydrodynamic diameter of NPs by DLS (nm)** | | **Polydispersity index** | |
| --- | --- | --- | --- | --- |
| **Average size** | **Standard deviation** | **Average value** | **Standard deviation** |
| 0 | 616 | 42 | 0.595 | 0.178 |
| 1 | 608 | 78 | 0.585 | 0.038 |
| 2 | 568 | 21 | 0.605 | 0.055 |
| 3 | 513 | 39 | 0.558 | 0.034 |
| 4 | 503 | 24 | 0.562 | 0.054 |
| 5 | 499 | 33 | 0.522 | 0.016 |
| 6 | 486 | 27 | 0.518 | 0.041 |
| 7 | 487 | 26 | 0.500 | 0.052 |
| 8 | 470 | 11 | 0.524 | 0.083 |
| 9 | 468 | 15 | 0.504 | 0.027 |
| 10 | 474 | 10 | 0.509 | 0.024 |
| 11 | 449 | 18 | 0.548 | 0.068 |
| 12 | 450 | 18 | 0.606 | 0.124 |
| 13 | 464 | 21 | 0.511 | 0.080 |
| 14 | 465 | 18 | 0.492 | 0.070 |
| 15 | 446 | 15 | 0.492 | 0.050 |
| 16 | 453 | 14 | 0.542 | 0.089 |
| 17 | 450 | 17 | 0.515 | 0.081 |
| 18 | 467 | 15 | 0.498 | 0.087 |
| 19 | 466 | 19 | 0.525 | 0.048 |
| 20 | 448 | 13 | 0.557 | 0.073 |
| 21 | 461 | 22 | 0.496 | 0.064 |
| 22 | 461 | 18 | 0.520 | 0.095 |
| 23 | 462 | 20 | 0.500 | 0.051 |
| 24 | 450 | 24 | 0.545 | 0.080 |

Table S14. The results of the characterization of a suspension of ZnO+10%Ag NPs in human saliva.

| **Analysis time (hours)** | **Hydrodynamic diameter of NPs by DLS (nm)** | | **Polydispersity index** | |
| --- | --- | --- | --- | --- |
| **Average size** | **Standard deviation** | **Average value** | **Standard deviation** |
| 0 | 531 | 84 | 0.583 | 0.116 |
| 1 | 409 | 16 | 0.369 | 0.031 |
| 2 | 398 | 18 | 0.376 | 0.039 |
| 3 | 389 | 13 | 0.369 | 0.035 |
| 4 | 401 | 9 | 0.365 | 0.026 |
| 5 | 396 | 4 | 0.345 | 0.026 |
| 6 | 398 | 9 | 0.368 | 0.039 |
| 7 | 399 | 11 | 0.377 | 0.056 |
| 8 | 406 | 7 | 0.371 | 0.022 |
| 9 | 414 | 11 | 0.363 | 0.017 |
| 10 | 403 | 10 | 0.402 | 0.054 |
| 11 | 400 | 10 | 0.392 | 0.048 |
| 12 | 409 | 8 | 0.403 | 0.059 |
| 13 | 409 | 9 | 0.413 | 0.046 |
| 14 | 410 | 20 | 0.383 | 0.037 |
| 15 | 402 | 11 | 0.391 | 0.040 |
| 16 | 401 | 7 | 0.365 | 0.029 |
| 17 | 404 | 13 | 0.372 | 0.018 |
| 18 | 389 | 10 | 0.372 | 0.046 |
| 19 | 388 | 11 | 0.352 | 0.004 |
| 20 | 383 | 9 | 0.344 | 0.021 |
| 21 | 374 | 8 | 0.343 | 0.019 |
| 22 | 366 | 4 | 0.354 | 0.043 |
| 23 | 358 | 9 | 0.362 | 0.023 |
| 24 | 359 | 9 | 0.337 | 0.022 |

Table S15. The results of the characterization of a suspension of Ag NPs in human saliva.


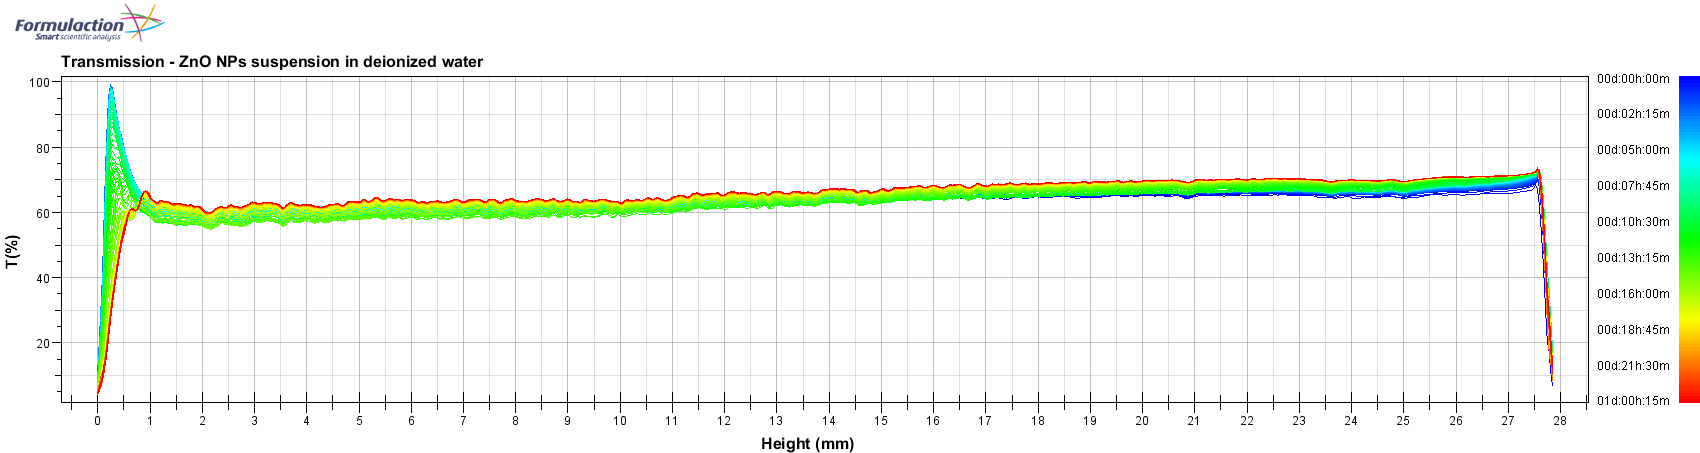


Figure S1. Transmission profile of ZnO NPs suspension in deionised water.


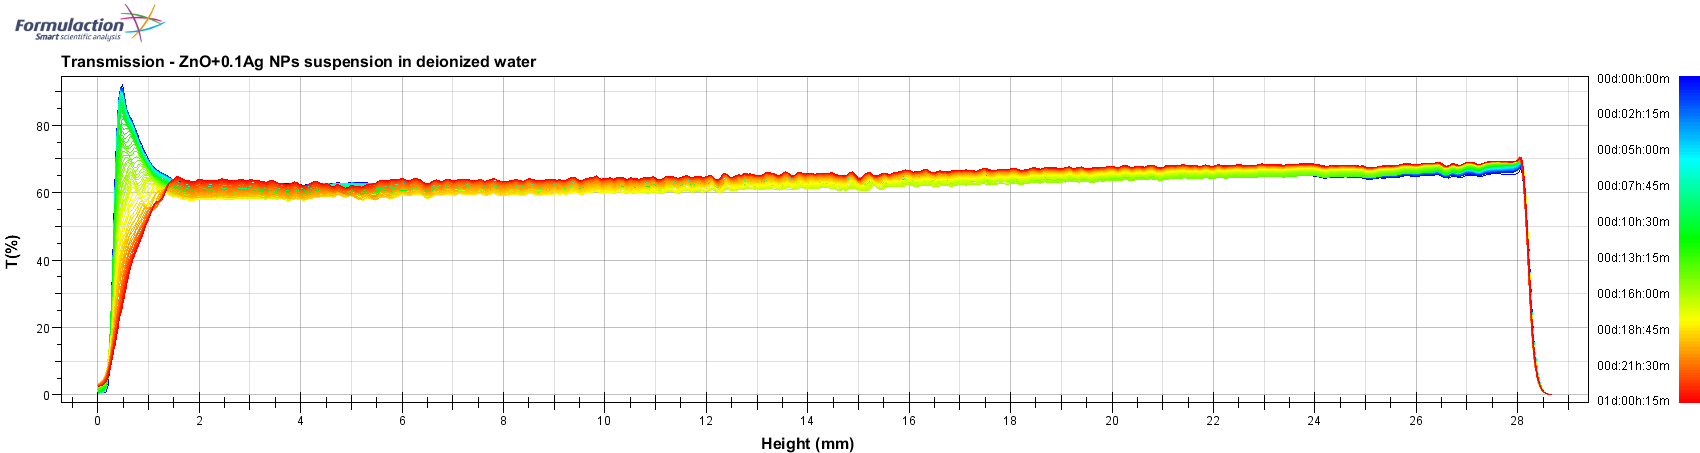


Figure S2. Transmission profile of ZnO+0.1%Ag NPs suspension in deionised water.


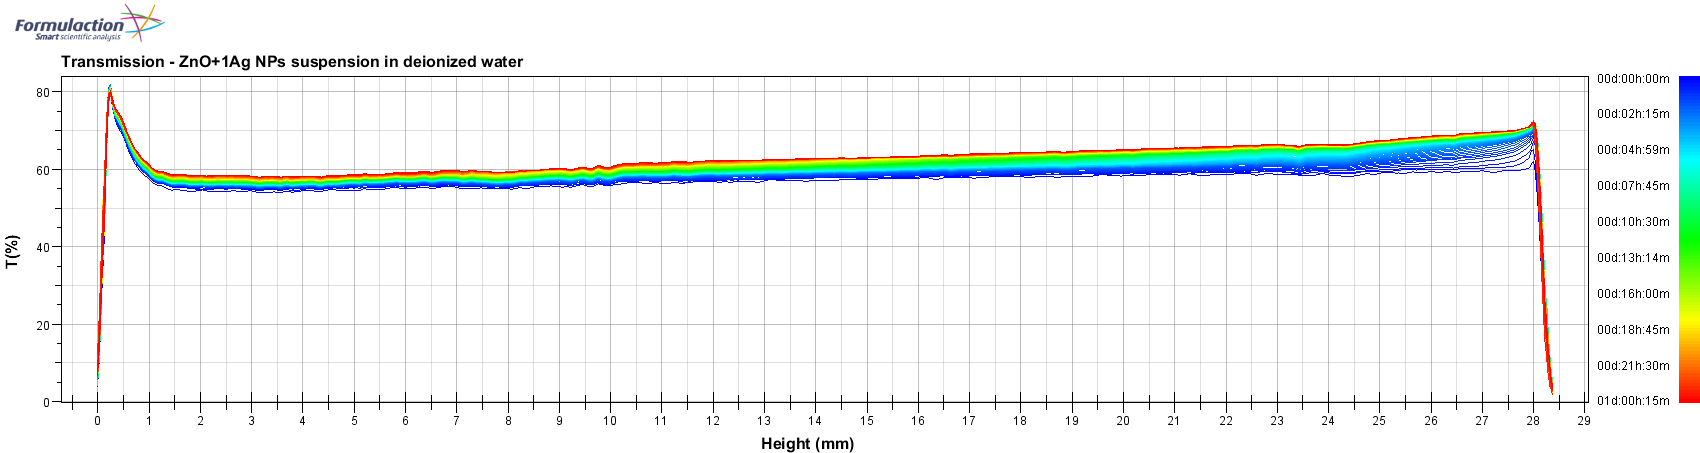


Figure S3. Transmission profile of ZnO+1%Ag NPs suspension in deionised water.


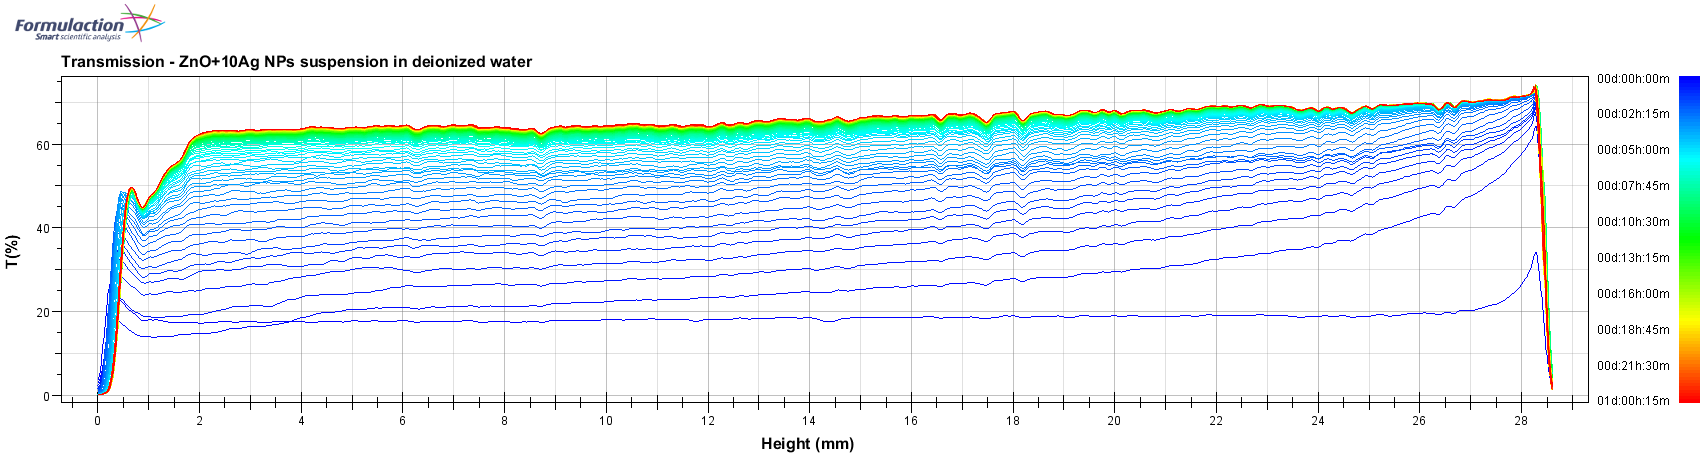


Figure S4. Transmission profile of ZnO+10%Ag NPs suspension in deionised water.


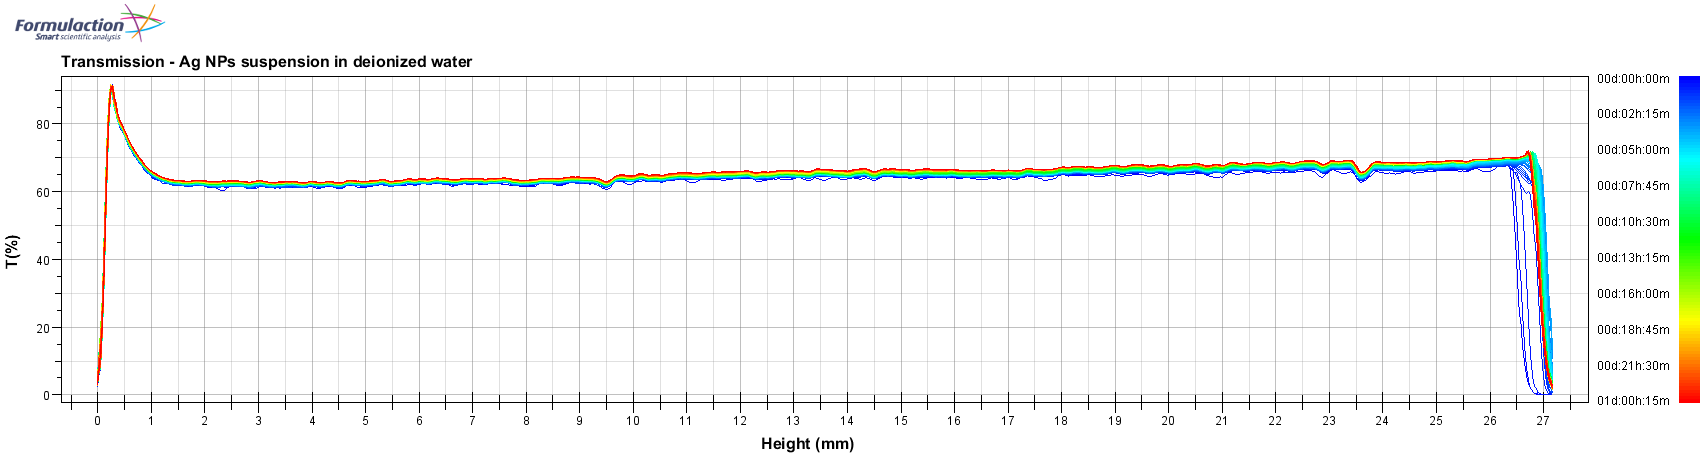


Figure S5. Transmission profile of Ag NPs suspension in deionised water.


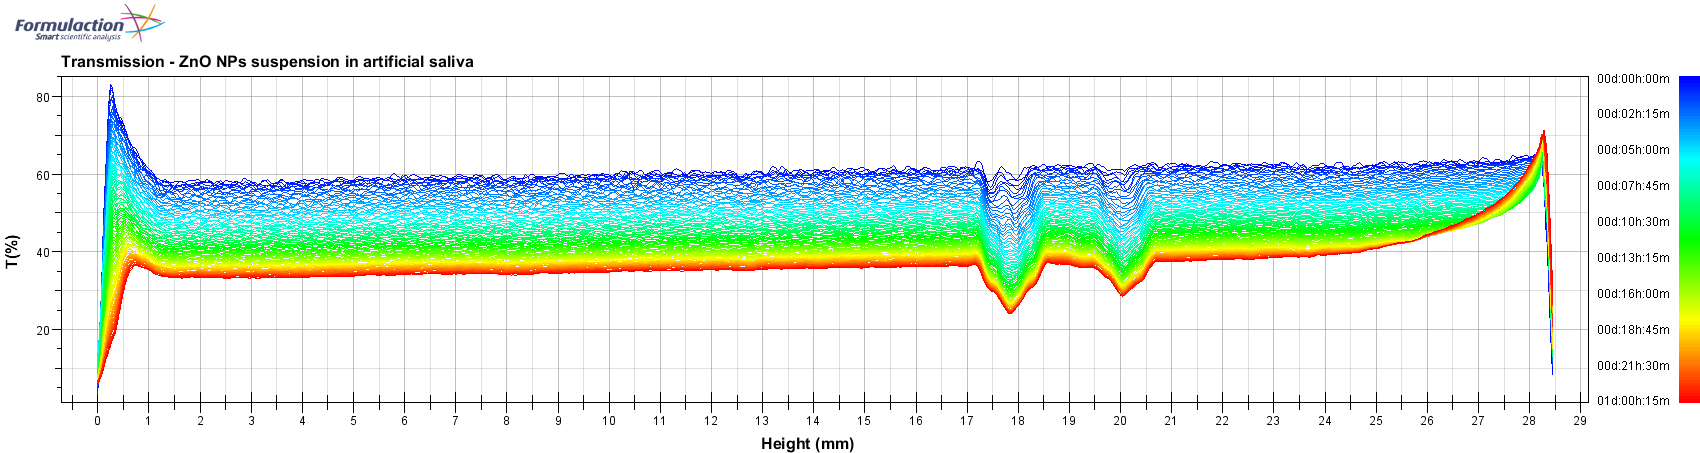


Figure S6. Transmission profile of ZnO NPs suspension in artificial saliva.


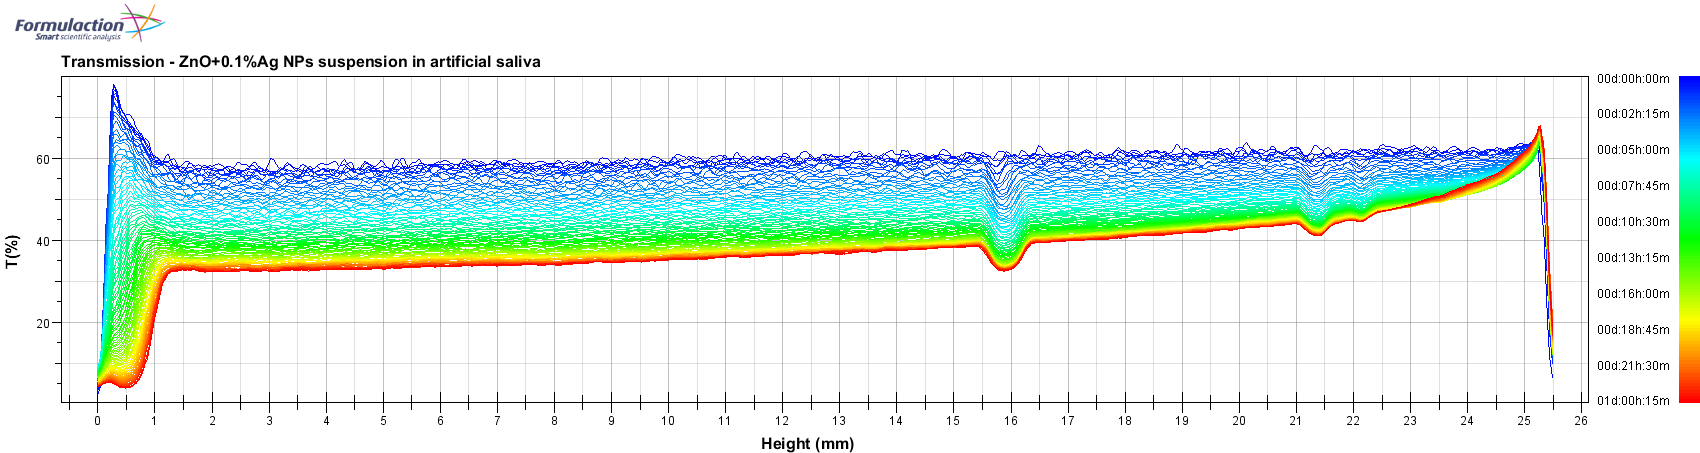


Figure S7. Transmission profiles of ZnO+0.1%Ag NPs suspension in artificial saliva.


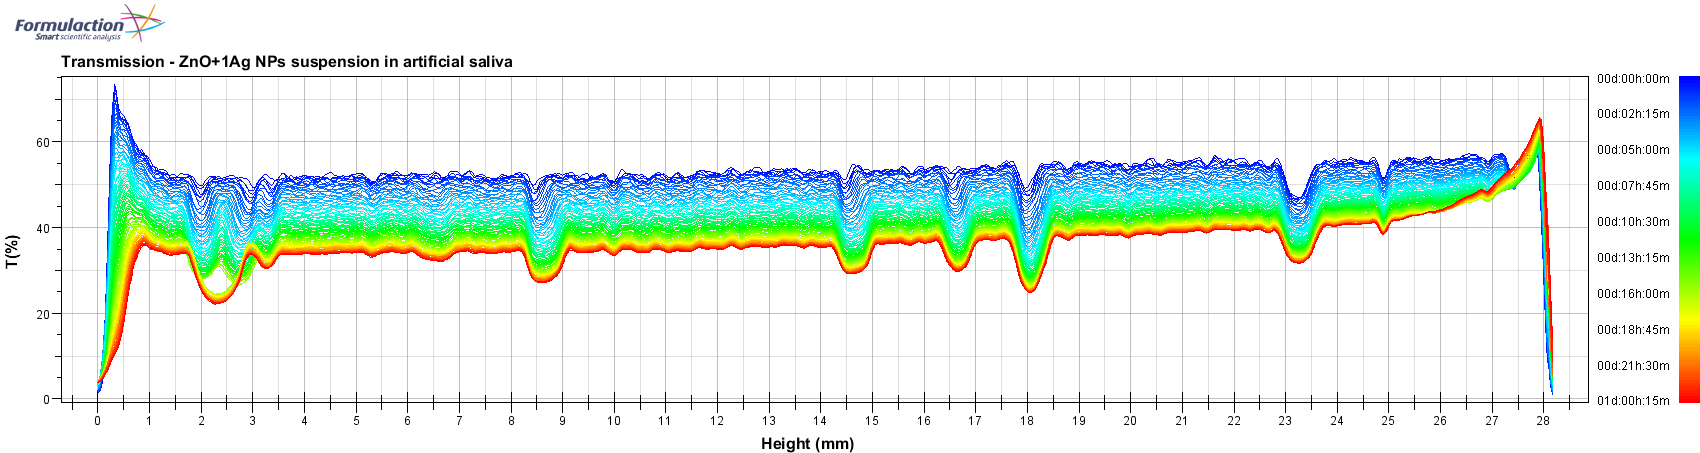


Figure S8. Transmission profile of ZnO+1%Ag NPs suspension in artificial saliva.


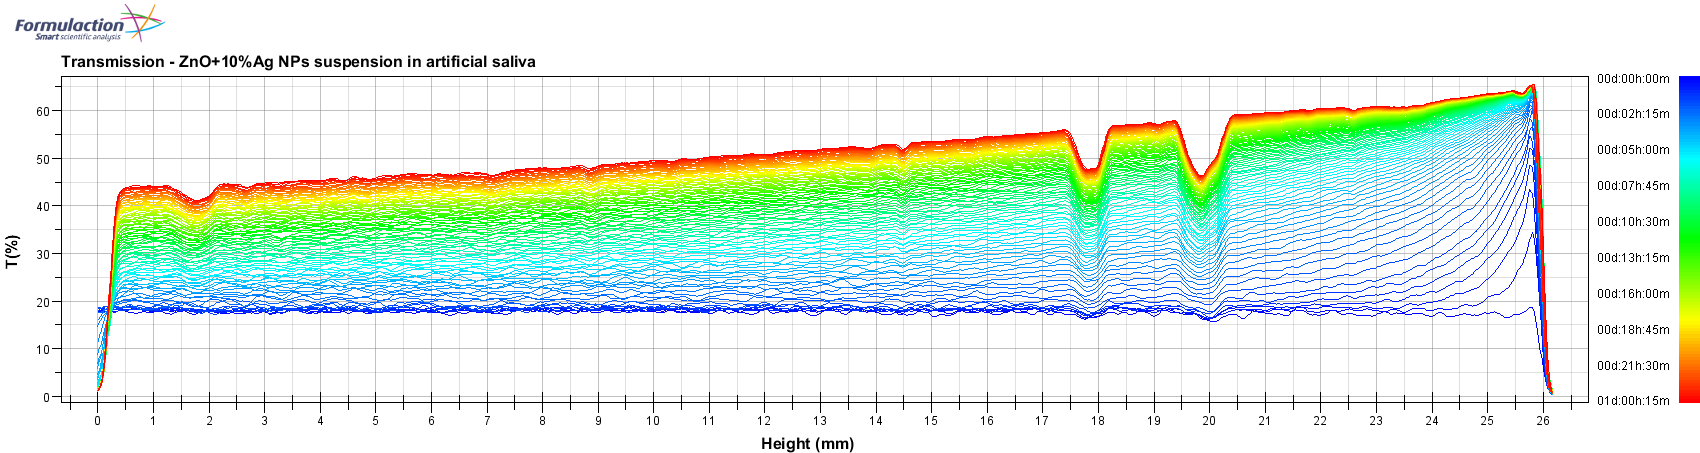


Figure S9. Transmission profile of ZnO+10%Ag NPs suspension in artificial saliva.


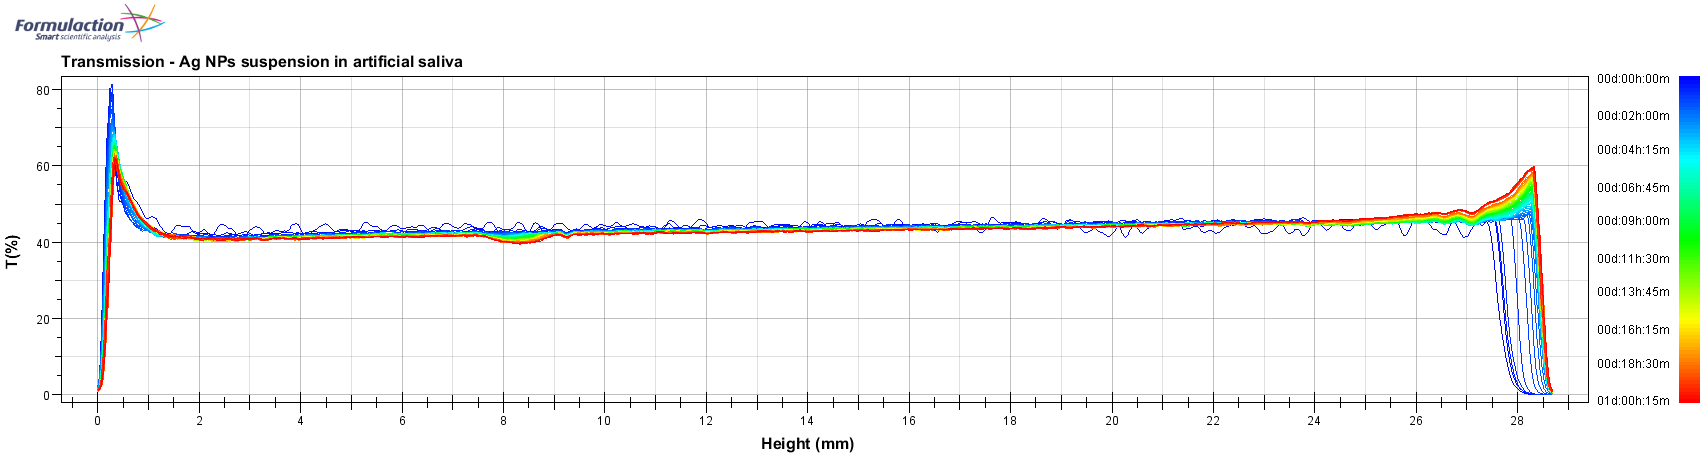


Figure S10. Transmission profile of Ag NPs suspension in artificial saliva.


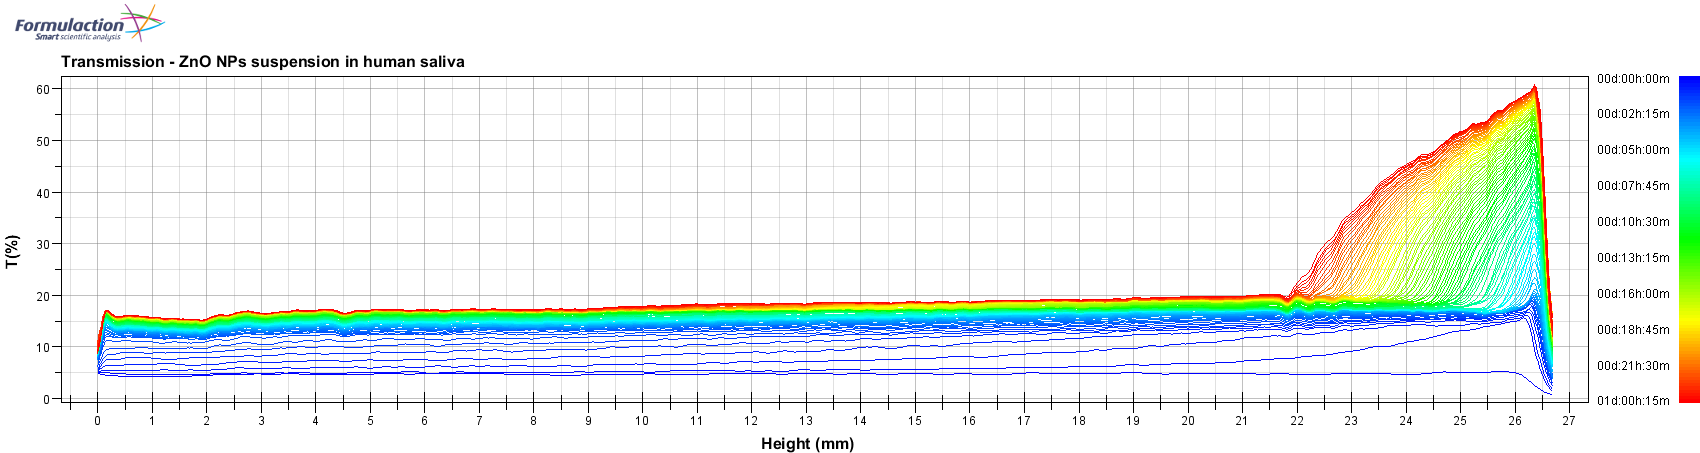


Figures S11. Transmission profile of ZnO NPs suspension in human saliva.


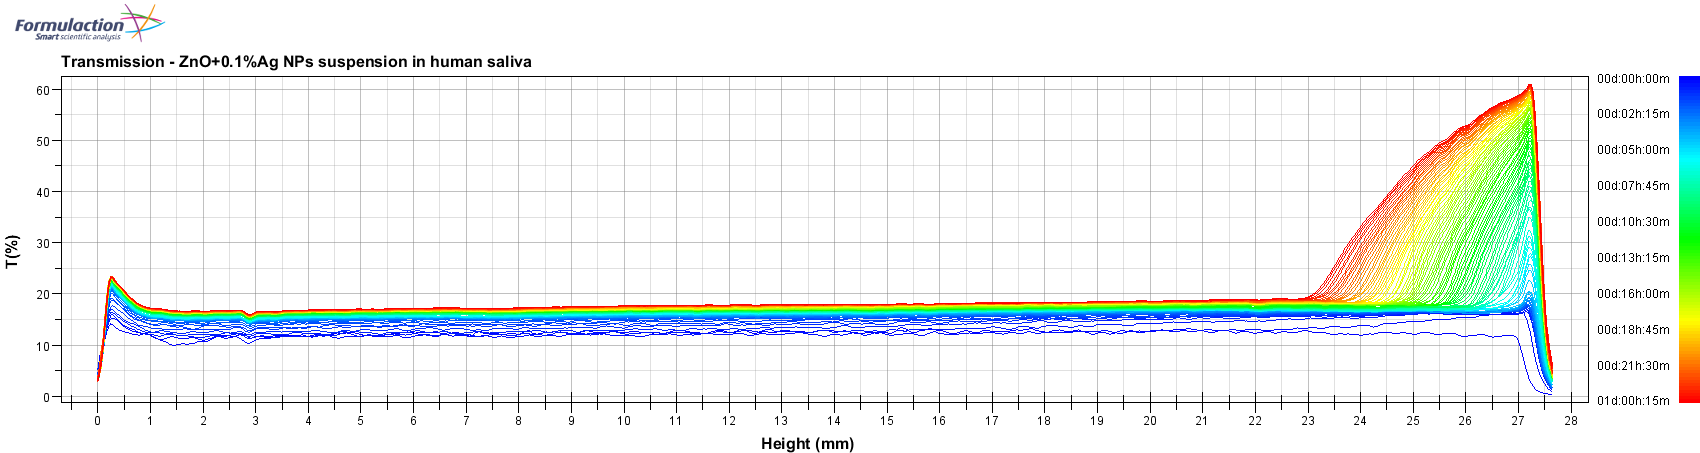


Figures S12. Transmission profile of ZnO+0.1%Ag NPs suspension in human saliva.


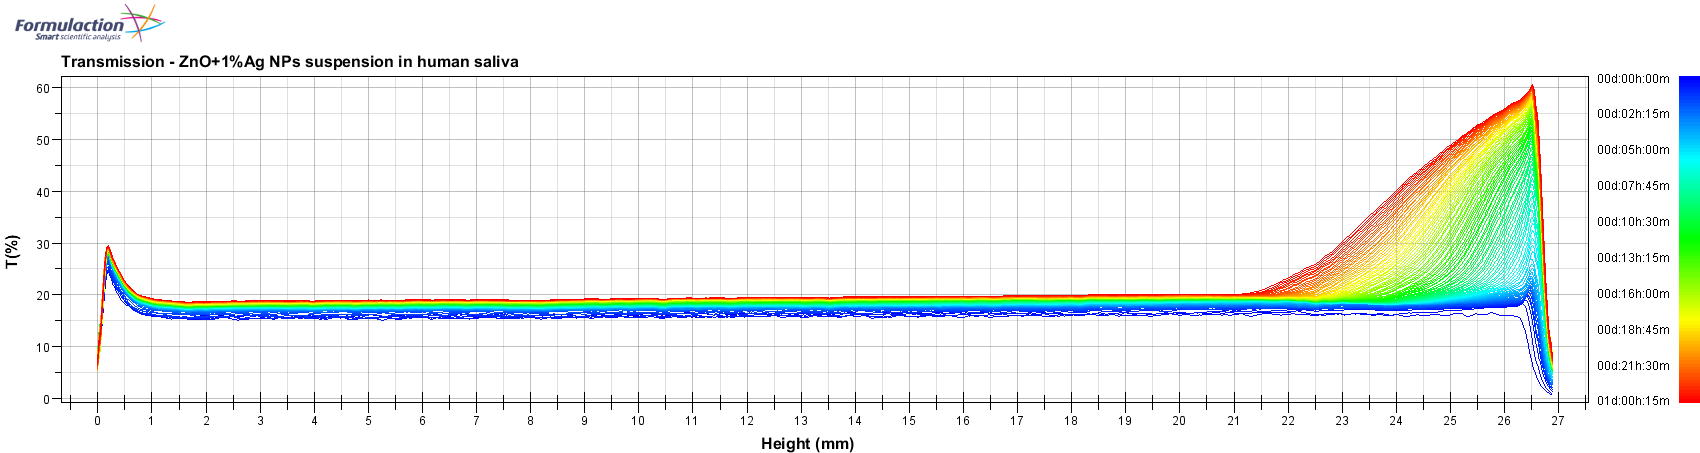


Figure S13. Transmission profile of ZnO+1%Ag NPs suspension in human saliva.


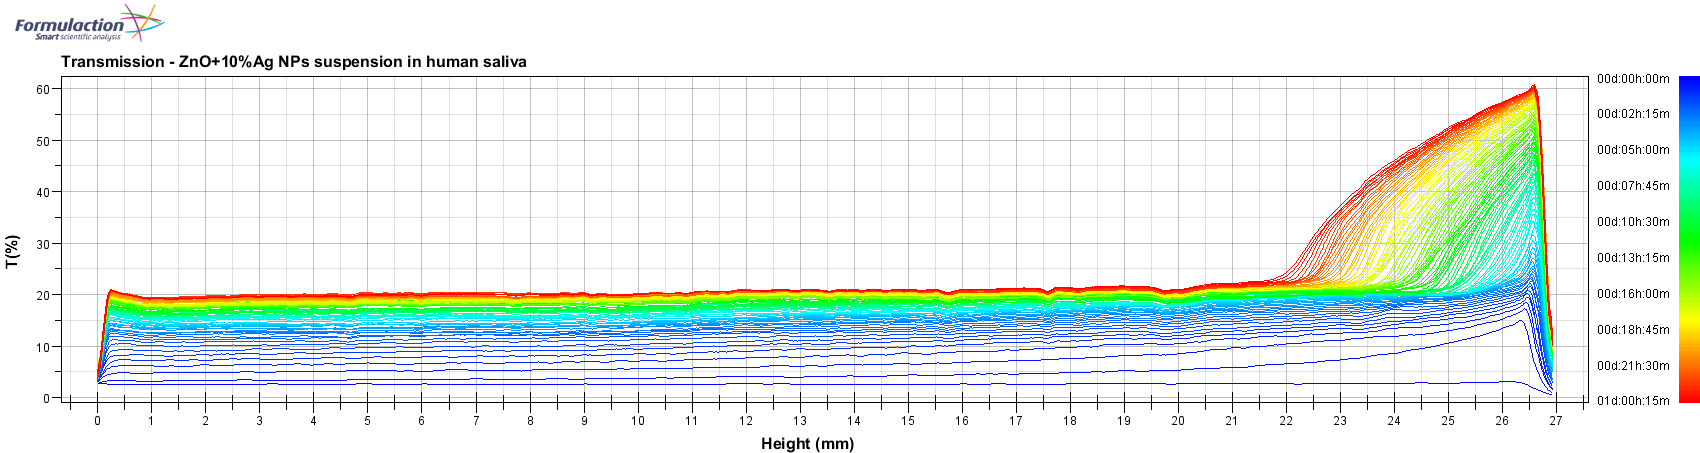


Figure S14. Transmission profile of ZnO+10%Ag NPs suspension in human saliva.


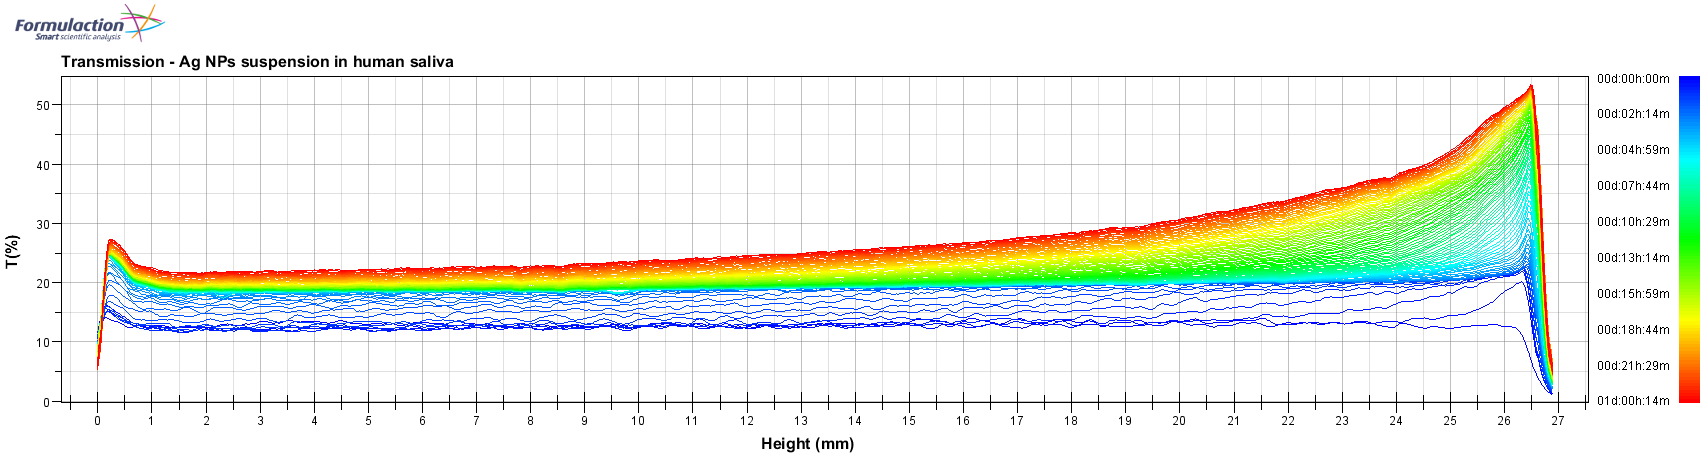


Figure S15. Transmission profile of Ag NPs suspension in human saliva.
